# Supplementary material for: Clinical efficacy and regulatory mechanisms of Shi Pi Zeng Ye formula in treating functional constipation comorbid with depression: integrating clinical observation, mass spectrometry, bioinformatics, and molecular docking
Source: Frontiers journal article supplement (doi:10.3389/fphar.2025.1645277), 2025-08-20
Supplement: Data_Sheet_3.pdf [file Data_Sheet_3.pdf]

**Quality of Life Scale for Constipation Patients (PAC-QOL)**

PAC-QOL reflects the impact of constipation on your daily life over the past two weeks. Choose an answer for each question.

| The following questions are related to symptoms of constipation. The severity or intensity of the following symptoms in the past two weeks... | Not at all               | A little bit             | General                  | More serious             | Very serious             |
|-----------------------------------------------------------------------------------------------------------------------------------------------|--------------------------|--------------------------|--------------------------|--------------------------|--------------------------|
|                                                                                                                                               | 0                        | 1                        | 2                        | 3                        | 4                        |
| 1. Feeling bloated?                                                                                                                           | <input type="checkbox"/> | <input type="checkbox"/> | <input type="checkbox"/> | <input type="checkbox"/> | <input type="checkbox"/> |
| 2. Feel heavy?                                                                                                                                | <input type="checkbox"/> | <input type="checkbox"/> | <input type="checkbox"/> | <input type="checkbox"/> | <input type="checkbox"/> |

| The following questions about constipation and daily life. How much time in the past two weeks... | No time                  | Occasionally             | Sometimes                | Most time                | Always                   |
|---------------------------------------------------------------------------------------------------|--------------------------|--------------------------|--------------------------|--------------------------|--------------------------|
|                                                                                                   | 0                        | 1                        | 2                        | 3                        | 4                        |
| 3. Feeling unwell?                                                                                | <input type="checkbox"/> | <input type="checkbox"/> | <input type="checkbox"/> | <input type="checkbox"/> | <input type="checkbox"/> |
| 4. Feel the urge to defecate but have difficulty doing so?                                        | <input type="checkbox"/> | <input type="checkbox"/> | <input type="checkbox"/> | <input type="checkbox"/> | <input type="checkbox"/> |
| 5. Feeling uncomfortable in the company of others?                                                | <input type="checkbox"/> | <input type="checkbox"/> | <input type="checkbox"/> | <input type="checkbox"/> | <input type="checkbox"/> |
| 6. Eating less and less because of constipation?                                                  | <input type="checkbox"/> | <input type="checkbox"/> | <input type="checkbox"/> | <input type="checkbox"/> | <input type="checkbox"/> |

| The following questions about constipation and daily life, the severity and intensity of the following questions in the past two weeks... | Not at all               | A little bit             | General                  | More serious             | Very serious             |
|-------------------------------------------------------------------------------------------------------------------------------------------|--------------------------|--------------------------|--------------------------|--------------------------|--------------------------|
|                                                                                                                                           | 0                        | 1                        | 2                        | 3                        | 4                        |
| 7. Must be concerned about what to eat                                                                                                    | <input type="checkbox"/> | <input type="checkbox"/> | <input type="checkbox"/> | <input type="checkbox"/> | <input type="checkbox"/> |
| 8. Loss of appetite                                                                                                                       | <input type="checkbox"/> | <input type="checkbox"/> | <input type="checkbox"/> | <input type="checkbox"/> | <input type="checkbox"/> |
| 9. Worry about not being able to choose food at will (such as at a friend's house)                                                        | <input type="checkbox"/> | <input type="checkbox"/> | <input type="checkbox"/> | <input type="checkbox"/> | <input type="checkbox"/> |

|                                                                                      |                          |                          |                          |                          |                          |
|--------------------------------------------------------------------------------------|--------------------------|--------------------------|--------------------------|--------------------------|--------------------------|
| 's house)                                                                            |                          |                          |                          |                          |                          |
| 10. Feeling uncomfortable for spending too much time in the bathroom when you're out | <input type="checkbox"/> | <input type="checkbox"/> | <input type="checkbox"/> | <input type="checkbox"/> | <input type="checkbox"/> |
| 11. Feeling uncomfortable going to the bathroom frequently while on the go           | <input type="checkbox"/> | <input type="checkbox"/> | <input type="checkbox"/> | <input type="checkbox"/> | <input type="checkbox"/> |
| 12. Always worried about changing living habits (such as traveling, going out, etc.) | <input type="checkbox"/> | <input type="checkbox"/> | <input type="checkbox"/> | <input type="checkbox"/> | <input type="checkbox"/> |

| The following question is related to the feeling of constipation. The time and frequency of the following symptoms occurring in the past two weeks... | No time                  | Occasionally             | Sometimes                | Most time                | Always                   |
|-------------------------------------------------------------------------------------------------------------------------------------------------------|--------------------------|--------------------------|--------------------------|--------------------------|--------------------------|
|                                                                                                                                                       | 0                        | 1                        | 2                        | 3                        | 4                        |
| 13. Feeling irritable                                                                                                                                 | <input type="checkbox"/> | <input type="checkbox"/> | <input type="checkbox"/> | <input type="checkbox"/> | <input type="checkbox"/> |
| 14. Feeling uneasy                                                                                                                                    | <input type="checkbox"/> | <input type="checkbox"/> | <input type="checkbox"/> | <input type="checkbox"/> | <input type="checkbox"/> |
| 15. Always troubled                                                                                                                                   | <input type="checkbox"/> | <input type="checkbox"/> | <input type="checkbox"/> | <input type="checkbox"/> | <input type="checkbox"/> |
| 16. Feeling nervous                                                                                                                                   | <input type="checkbox"/> | <input type="checkbox"/> | <input type="checkbox"/> | <input type="checkbox"/> | <input type="checkbox"/> |
| 17. Feeling lacking in confidence                                                                                                                     | <input type="checkbox"/> | <input type="checkbox"/> | <input type="checkbox"/> | <input type="checkbox"/> | <input type="checkbox"/> |
| 18. Feeling out of control of life                                                                                                                    | <input type="checkbox"/> | <input type="checkbox"/> | <input type="checkbox"/> | <input type="checkbox"/> | <input type="checkbox"/> |

| The following questions are related to the feeling of constipation. The severity | Not at all | A little bit | General | Rather serious | Very serious |
|----------------------------------------------------------------------------------|------------|--------------|---------|----------------|--------------|
|                                                                                  | 0          | 1            | 2       | 3              | 4            |

|                                                                    |                          |                          |                          |                          |                          |
|--------------------------------------------------------------------|--------------------------|--------------------------|--------------------------|--------------------------|--------------------------|
| and intensity of the following problems over the past two weeks... |                          |                          |                          |                          |                          |
| 19. Worrying about not knowing when to defecate                    | <input type="checkbox"/> | <input type="checkbox"/> | <input type="checkbox"/> | <input type="checkbox"/> | <input type="checkbox"/> |
| 20 Worry about not being able to defecate                          | <input type="checkbox"/> | <input type="checkbox"/> | <input type="checkbox"/> | <input type="checkbox"/> | <input type="checkbox"/> |
| 21. To be affected by not defecating                               | <input type="checkbox"/> | <input type="checkbox"/> | <input type="checkbox"/> | <input type="checkbox"/> | <input type="checkbox"/> |

| The following questions about constipation and daily life. The time and frequency of the following symptoms over the past two weeks... | No time                  | Occasionally             | Sometimes                | Most time                | Always                   |
|----------------------------------------------------------------------------------------------------------------------------------------|--------------------------|--------------------------|--------------------------|--------------------------|--------------------------|
|                                                                                                                                        | 0                        | 1                        | 2                        | 3                        | 4                        |
| 22. Worrying that things are getting worse                                                                                             | <input type="checkbox"/> | <input type="checkbox"/> | <input type="checkbox"/> | <input type="checkbox"/> | <input type="checkbox"/> |
| 23. Feeling that the body is not functioning                                                                                           | <input type="checkbox"/> | <input type="checkbox"/> | <input type="checkbox"/> | <input type="checkbox"/> | <input type="checkbox"/> |
| 24. Defecate less frequently than expected                                                                                             | <input type="checkbox"/> | <input type="checkbox"/> | <input type="checkbox"/> | <input type="checkbox"/> | <input type="checkbox"/> |

| The following question is about satisfaction. The severity and intensity of the following questions over the past two weeks... | Satisfied                | Relatively satisfied     | Generally                | A little dissatisfied    | Very dissatisfied        |
|--------------------------------------------------------------------------------------------------------------------------------|--------------------------|--------------------------|--------------------------|--------------------------|--------------------------|
|                                                                                                                                | 0                        | 1                        | 2                        | 3                        | 4                        |
| 25. Are you satisfied with the number of bowel movements?                                                                      | <input type="checkbox"/> | <input type="checkbox"/> | <input type="checkbox"/> | <input type="checkbox"/> | <input type="checkbox"/> |
| 26. Are you satisfied with regular bowel movements?                                                                            | <input type="checkbox"/> | <input type="checkbox"/> | <input type="checkbox"/> | <input type="checkbox"/> | <input type="checkbox"/> |

|                                                                                   |                          |                          |                          |                          |                          |
|-----------------------------------------------------------------------------------|--------------------------|--------------------------|--------------------------|--------------------------|--------------------------|
| 27. Are you satisfied with the time it takes for things to pass through your gut? | <input type="checkbox"/> | <input type="checkbox"/> | <input type="checkbox"/> | <input type="checkbox"/> | <input type="checkbox"/> |
| 28. Are you satisfied with your previous treatments?                              | <input type="checkbox"/> | <input type="checkbox"/> | <input type="checkbox"/> | <input type="checkbox"/> | <input type="checkbox"/> |

PAC-QoL is a self-reported questionnaire used to measure a patient's quality of life. The verified PAC-QoL consists of 28 items and is divided into four subscales: physical discomfort, psychosocial discomfort, worry and concern, and satisfaction. The first three subscales are used to assess the patient's dissatisfaction index, with total scores ranging from 0 to 96(the lower the score, the better the quality of life). The satisfaction subscale consists of four items, with overall scores ranging from 0 to 16, so each patient's self-reported final outcome is defined as poor (0-4), fairly good (5-8), good (9-12), or excellent (13-16).
